# Supplementary material
Source: Elsevier journal article supplement (https://www.sciencedirect.com/science/article/pii/S0021755721001674)
Supplement: mmc1 [file S0021755721001674:mmc1.docx]

**JPED-D-21-00162 - Supplementary Material**

**Table S1 - Sets of panels A, B and C of viral agents, controls and length of PCR fragments according to viral detection Seeplex® RV15 ACE Detection Kit.**

| Set | Viral agents and controls | Length (bp) |
| --- | --- | --- |
| All | Internal control | 850 |
| A | Human Adenovirus (AdV – A/B/C/D/E) | 534 |
| Human Coronavirus (CoV NL63/229E) | 375 |
| Human Parainfluenza (PIV 1) | 153 |
| Human Parainfluenza (PIV 2) | 189 |
| Human Parainfluenza (PIV 3) | 264 |
| B | Human Coronavirus (CoV OC43) | 578 |
| Human Respiratory Syncytial Virus A (RSV A) | 269 |
| Human Respiratory Syncytial Virus B (RSV B) | 155 |
| Human Rhinovirus (RV A/B/C) | 394 |
| Influenza A (FLU A) | 206 |
| C | Human Bocavirus (BoV 1/2/3/4) | 579 |
| Human Enterovirus (EV) | 194 |
| Human Metapneumovirus (MPV) | 351 |
| Human Parainfluenza (PIV 4) | 249 |
| Influenza B (FLU B) | 455 |
